# Supplementary material
Source: publisher site journal article supplement (https://www.dovepress.com/article/260599)
Supplement: Supplementary file 1 [file get_supplementary_file.php]

Supplementary Table 1 Correlation between ASCL-1, SLFN11 and clinicalpathological factors.

|  | SLFN11 negative  (*n*, mean±SEM) | SLFN11 positive  (*n*, mean±SEM) | χ2/*t* | *P* | ASCL-1 negative  (*n*, mean±SEM) | ASCL-1 positive  (*n*, mean±SEM) | χ2/*t* | *P* |
| --- | --- | --- | --- | --- | --- | --- | --- | --- |
| Age |  |  |  |  |  |  |  |  |
| >=60 | 16 | 13 |  |  | 10 | 19 |  |  |
| <60 | 7 | 7 | 0.102 | 0.750 | 4 | 10 | 0.147 | 0.702 |
| Gender |  |  |  |  |  |  |  |  |
| Male | 17 | 18 |  |  | 12 | 23 |  |  |
| Female | 6 | 2 | 1.786 | 0.181 | 2 | 6 | 0.250 | 0.617 |
| Smoking status |  |  |  |  |  |  |  |  |
| Smoker | 16 | 15 |  |  | 3 | 9 |  |  |
| Non-smoker | 7 | 5 | 0.157 | 0.629 | 11 | 20 | 0.423 | 0.515 |
| Smoking Index | 528.26±103.06 | 395.00±98.60 | 0.927 | 0.359 | 560.71±115.81 | 420.69±90.38 | 0.915 | 0.366 |
| Onset symptom |  |  |  |  |  |  |  |  |
| No | 9 | 10 |  |  | 8 | 11 |  |  |
| Yes | 14 | 10 | 0.501 | 0.479 | 6 | 18 | 1.413 | 0.235 |
| Comorbidities |  |  |  |  |  |  |  |  |
| No | 12 | 11 |  |  | 10 | 13 |  |  |
| Yes | 11 | 9 | 0.034 | 0.853 | 4 | 16 | 2.686 | 0.101 |
| Central or Peripheral |  |  |  |  |  |  |  |  |
| Central | 14 | 13 |  |  | 7 | 20 |  |  |
| Peripheral | 9 | 7 | 0.078 | 0.780 | 7 | 9 | 1.454 | 0.228 |
| Adjuvant therapy |  |  |  |  |  |  |  |  |
| No | 14 | 13 |  |  | 10 | 17 |  |  |
| Yes | 9 | 7 | 0.078 | 0.780 | 4 | 12 | 0.648 | 0.421 |
| NSE level |  |  |  |  |  |  |  |  |
| NSE normal | 0 | 2 |  |  | 0 | 2 |  |  |
| NSE high | 16 | 11 | 2.644 | 0.104 | 7 | 20 | 0.684 | 0.408 |
| TNM Stage |  |  |  |  |  |  |  |  |
| I | 8 | 6 |  |  | 5 | 9 |  |  |
| II | 10 | 13 |  |  | 7 | 16 |  |  |
| III | 5 | 1 | 0.347 | 0.556 | 2 | 4 | 0.038 | 0.846 |


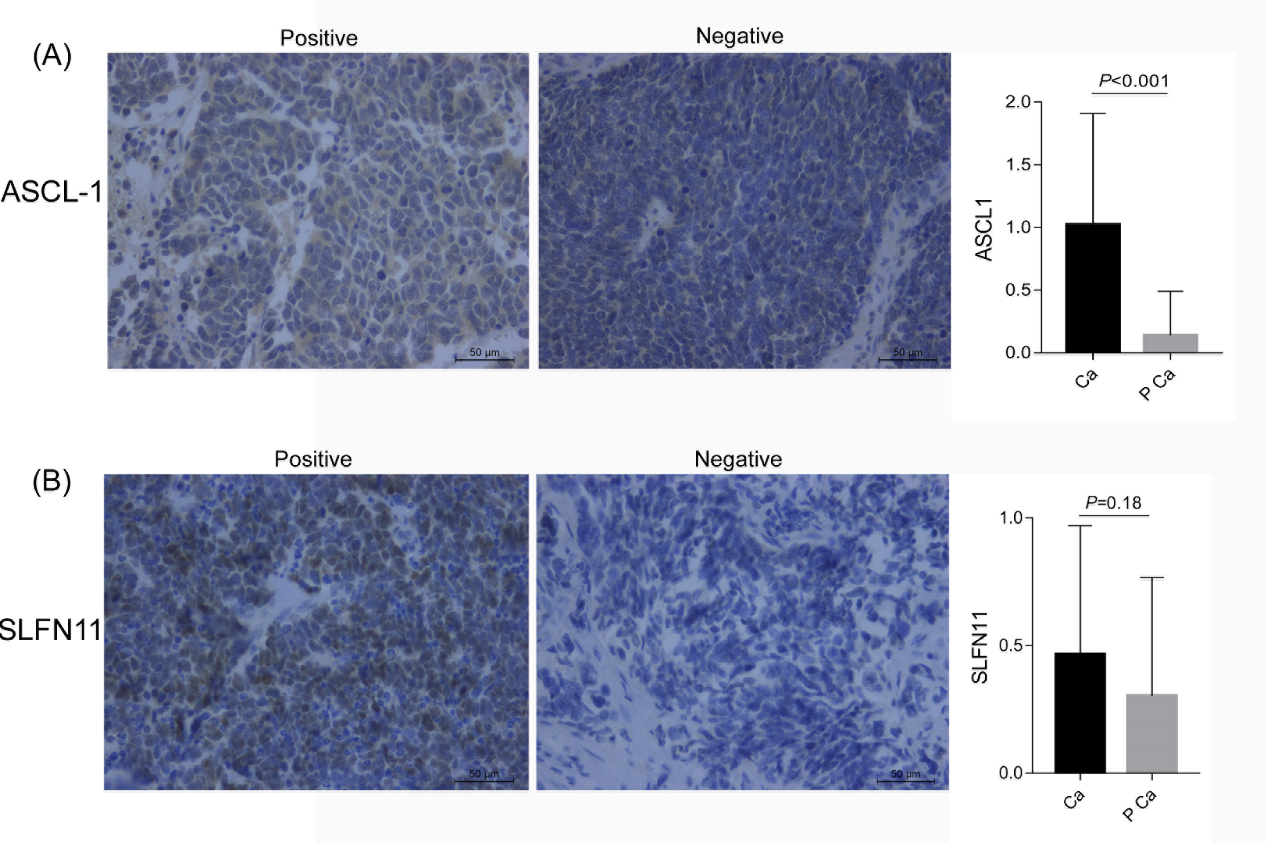


Supplementary Figure 1 The distribution of ASCL-1(A) and SLFN11(B).


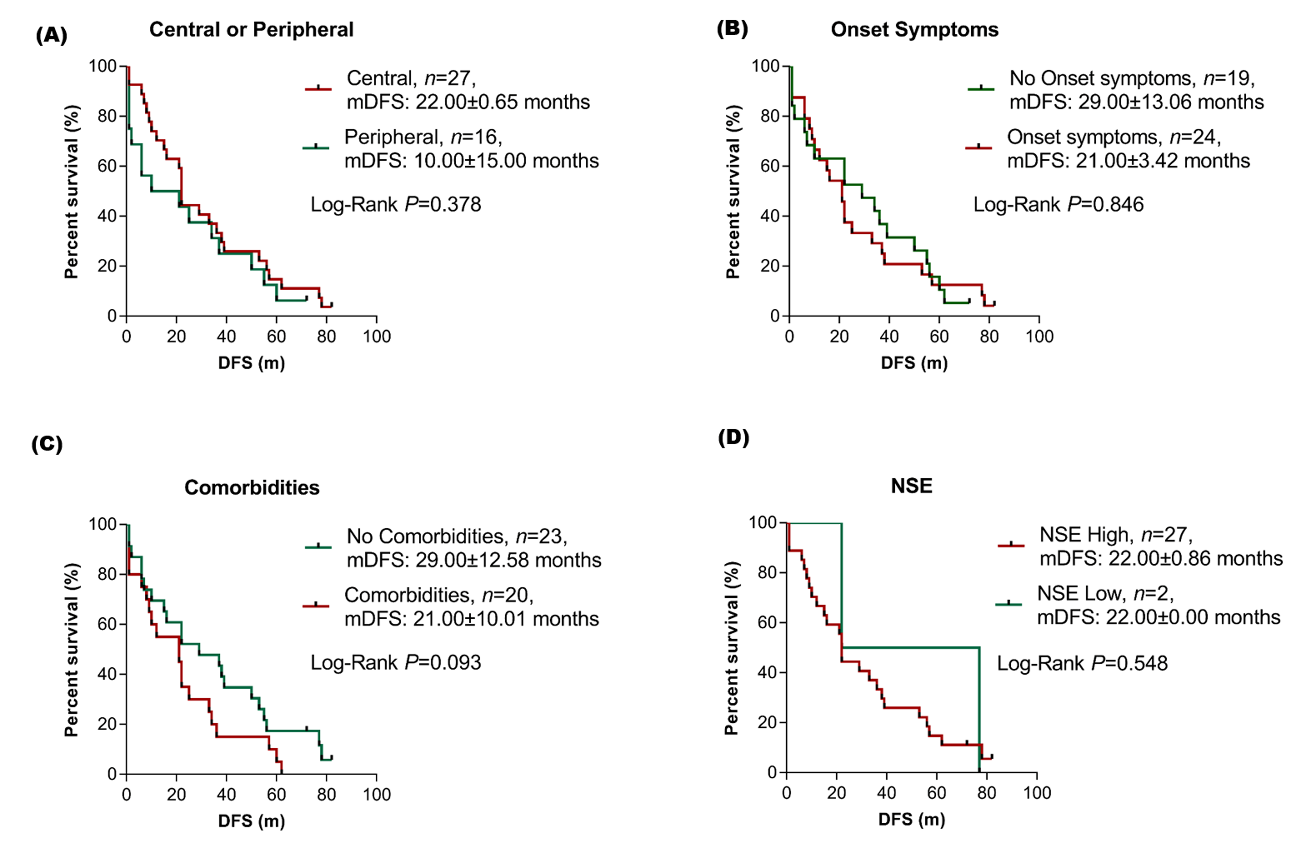


Supplementary Figure 2. Association between clinical pathological factors and DFS. (A) central or peripheral SCLC and DFS, (B) Onset symptoms and DFS, (C) Comorbidities and DFS, (D) NSE level and DFS.


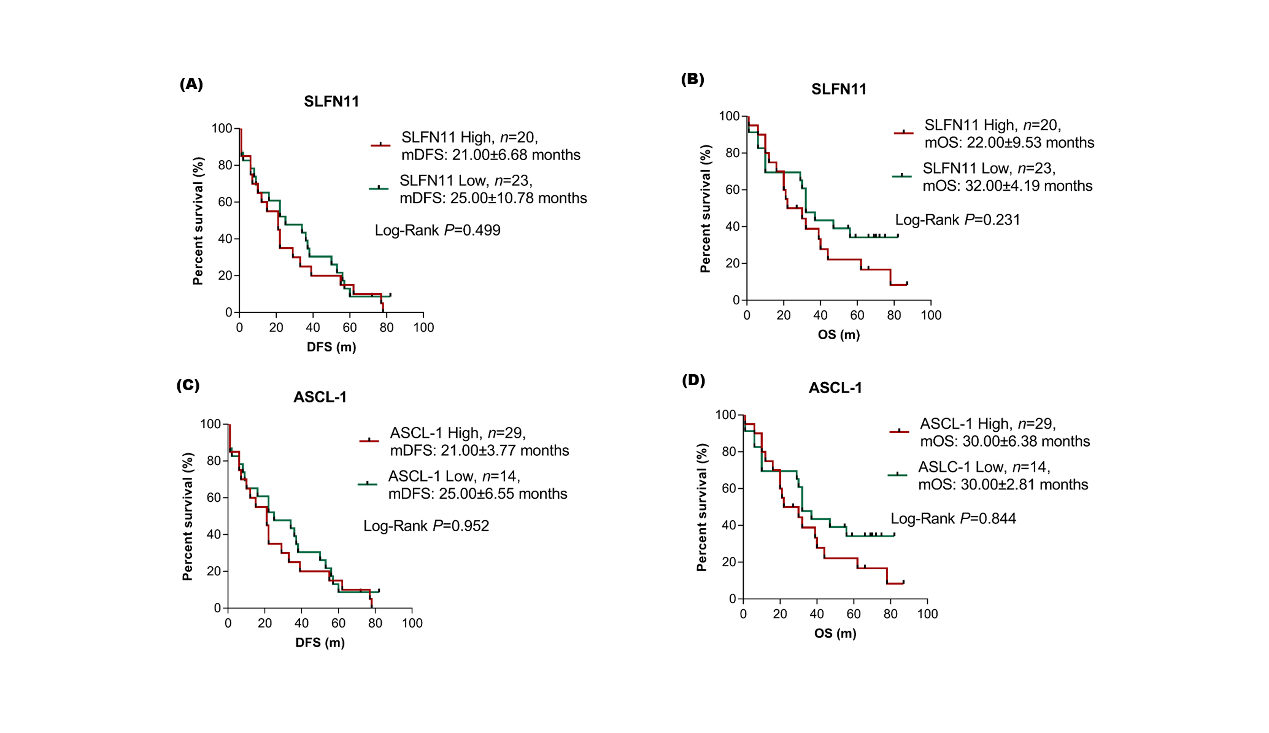


Supplementary Figure 3. The Kaplan-Meier plot of ASCL-1 and SLFN11. (A) SLFN11 and DFS, (B) SLFN11 and OS, (C) ASCL-1 and DFS, (D) ASCL-1 and OS.


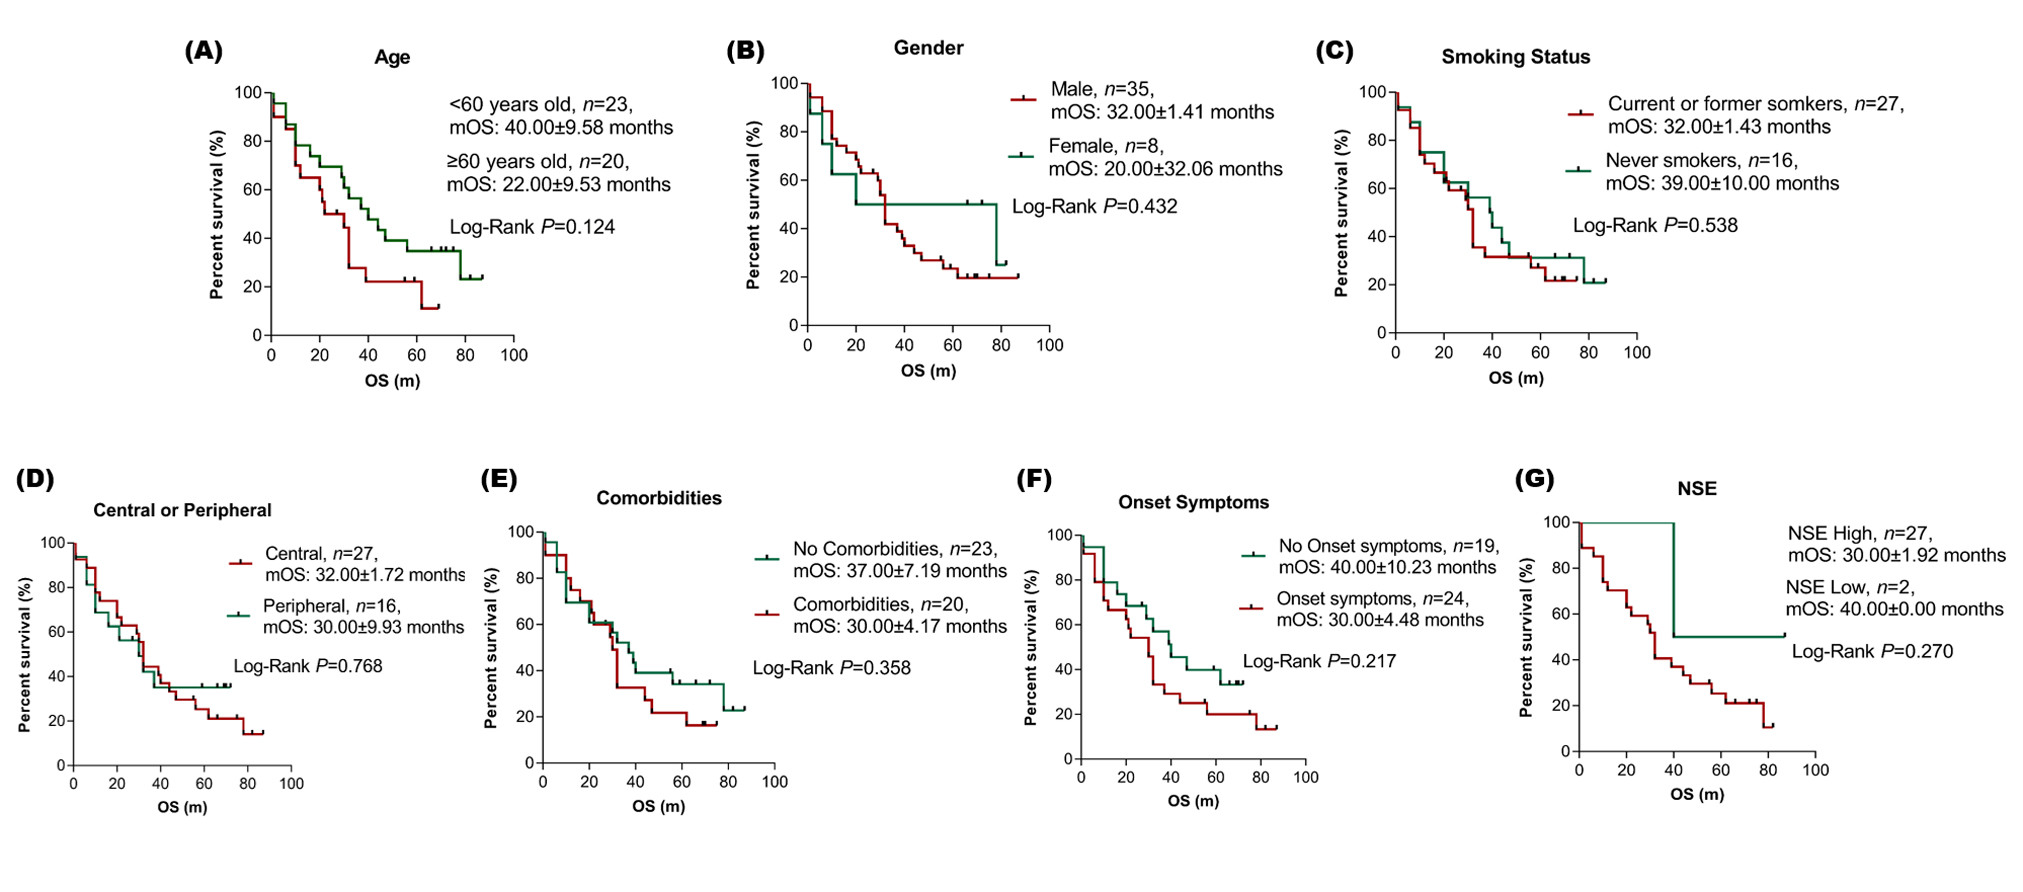


Supplementary Figure 4. Association between clinical pathological factors and OS. (A) age and OS, (B) gender and OS, (C) smoking status and OS, (D) central or peripheral SCLC and OS, (E) Comorbidities and OS, (F) onset symptoms and OS, (G) NSE level and OS.
